# Supplementary material for: Cold spells over Greenland during the mid-Pliocene Warm Period
Source: Research Square preprint supplement (doi:10.21203/rs.3.rs-4315645/v1), 2024-05-29
Supplement: Supplementary file 1 [file 2a97a9c6b84fd6e9a7649f32.xlsx]

## Sheet: Sheet1
Site	Hole	Core	Section	Interval (cm)	Depth (mbsf)	Depth (rmcd)1	Age (ka)1	Rwp	Calcite(%)	Dolomite(%)
U1307	B	15	4	130-132	134.1	143.41	2995.9	0.17	0	0
U1307	B	15	5	30-32	134.6	144.24	3003.7	0.23	0	0.9
U1307	B	15	5	80-82	135.1	145.07	3009.3	0.17	0.3	0.7
U1307	B	15	5	130-132	135.6	145.91	3015	0.18	4.9	0.9
U1307	B	15	6	10-12	135.9	146.41	3018.4	0.18	4.4	0.5
U1307	B	15	6	64-66	136.4	147.31	3024.5	0.18	0.3	0.9
U1307	B	15	6	128-130	137.08	148.38	3033.1	0.18	1.9	0.8
U1307	B	15	7	13-15	137.42	148.95	3038.8	0.17	0.8	0.3
U1307	B	15	7	45.5-47.5	137.75	149.5	3044.3	0.18	0.6	0.4
U1307	B	16	1	47-49	138.26	150.04	3049.7	0.18	0.2	0.8
U1307	B	16	1	92.5-94.5	138.72	150.51	3054.4	0.17	2.7	0.6
U1307	B	16	1	130-132	139.1	150.88	3058.1	0.18	8.9	0.8
U1307	B	16	2	62-64	139.91	151.69	3064.8	0.18	13.1	1
U1307	B	16	2	113-115	140.43	152.21	3068.8	0.18	9.3	0.8
U1307	B	16	3	5-7	140.85	152.63	3072.1	0.18	7.6	0.5
U1307	B	16	3	80-82	141.6	153.38	3078	0.19	15.3	1
U1307	B	16	3	130-132	142.1	153.88	3082	0.18	8.9	0.6
U1307	B	16	4	30-32	142.6	154.38	3085.9	0.18	7.6	0.7
U1307	B	16	4	80-82	143.1	154.88	3089.8	0.22	9.9	0.8
U1307	B	16	4	130-132	143.6	155.38	3093.8	0.18	8.1	1.3
U1307	B	16	5	30-32	144.1	155.88	3099.4	0.19	3.6	0.9
U1307	B	16	5	80-82	144.6	156.38	3105.1	0.18	1.4	0.6
U1307	B	16	5	130-132	145.1	156.88	3114.4	0.18	1.7	0.5
U1307	B	16	6	30-32	145.6	157.38	3116.28	0.18	1.2	0.7
U1307	B	16	6	80-82	146.1	157.88	3118	0.18	6.1	0.8
U1307	B	16	6	130-132	146.6	158.38	3119.79	0.18	6.4	0.5
U1307	B	16	7	30-32	147.1	158.88	3121.6	0.17	1	0.9
U1307	B	17	1	55-57	148.26	160.04	3125.78	0.18	3.1	0.8
U1307	B	17	1	130-132	149.01	160.79	3128.46	0.18	0.5	1.8
U1307	B	17	2	30-32	149.51	161.29	3130.31	0.18	0.8	1
U1307	B	17	2	80-82	150.01	161.79	3132.17	0.18	0.7	1.9
U1307	B	17	2	130-132	150.51	162.29	3134.03	0.19	0.5	3.2
U1307	B	17	3	30-32	151.01	162.79	3135.89	0.18	1.1	1.4
U1307	B	17	3	130-132	152.01	163.79	3139.39	0.18	0.1	0.8
U1307	B	17	4	50-52	152.71	164.49	3142.08	n.a.	n.a.	n.a.
U1307	B	17	4	130-132	153.51	165.29	3144.97	n.a.	n.a.	n.a.
U1307	A	19	1	130-132	154.4	167.13	3154.01	n.a.	n.a.	n.a.
U1307	A	19	2	80-82	155.4	168.13	3161.3	0.18	7	0.7
U1307	A	19	2	130-132	155.9	168.63	3164.9	0.19	10.4	0.7
U1307	A	19	3	30-32	156.4	169.13	3169.3	0.18	6.3	1.1
U1307	A	19	3	80-82	156.9	169.63	3175.2	0.19	6.9	1.5
U1307	A	19	3	130-132	157.4	170.13	3180.7	0.18	3.2	1.3
U1307	A	19	4	30-32	157.9	170.63	3186.9	0.18	1.9	0
U1307	A	19	4	80-82	158.4	171.13	3189.9	0.18	3.5	0.4
U1307	A	19	4	130-132	158.9	171.63	3192.5	0.18	2.8	0.8
U1307	A	19	5	30-32	159.4	172.13	3195.1	0.18	3.9	0.8
U1307	A	19	5	80-82	159.9	172.63	3197.6	0.18	8.4	0.8
U1307	A	19	5	130-132	160.4	173.13	3200.1	0.19	5.2	0.8
U1307	A	19	6	30-32	160.9	173.63	3202.7	0.18	7	1
U1307	A	19	6	80-82	161.4	174.13	3205.2	0.19	7.8	0.8
U1307	A	19	6	130-132	161.9	174.63	3208.54	0.17	3.5	0.6
U1307	A	19	7	20-22	162.3	175.03	3209.8	0.19	5.2	0
U1307	A	19	7	70-72	162.8	175.53	3212.3	0.18	3.8	0.6
1Blake-Mizen et al. (2019)
