# Supplementary material for: Cold spells over Greenland during the mid-Pliocene Warm Period
Source: Research Square preprint supplement (doi:10.21203/rs.3.rs-4315645/v1), 2024-05-29
Supplement: Supplementary file 2 [file d7088e2692be02b794df30fa.xlsx]

## Sheet: Sheet1
Site	Hole	Core	Section	Interval (cm)	Depth (mbsf)	Depth (rmcd)1	Age (ka)1	MEAN (µm)	SORTING (µm)	D90 (µm)	% SAND:	% MUD:	% V COARSE SAND:	% COARSE SAND:	% MEDIUM SAND:	% FINE SAND:	% V FINE SAND:	% V COARSE SILT:	% COARSE SILT:	% MEDIUM SILT:	% FINE SILT:	% V FINE SILT:	% CLAY:	Clay (%)	Silt (%)	Sand(%)
U1307	B	15	4	130-132	134.1	143.41	2995.9	n.a.	n.a.	n.a.	n.a.	n.a.	n.a.	n.a.	n.a.	n.a.	n.a.	n.a.	n.a.	n.a.	n.a.	n.a.	n.a.	n.a.	n.a.	n.a.
U1307	B	15	5	30-32	134.6	144.24	3003.7	12.3026	3.37173	50.3023	6.1542	93.8458	0	0	0.227192	0.796526	5.13048	16.8754	23.3791	19.7759	15.3192	10.2083	8.28789	8.28789	85.5579	6.1542
U1307	B	15	5	80-82	135.1	145.07	3009.3	15.9528	3.62758	69.8863	12.2923	87.7077	0	0	0.899414	2.58406	8.80881	20.9235	22.1018	16.4107	12.7048	8.5225	7.04441	7.04441	80.6633	12.2923
U1307	B	15	5	130-132	135.6	145.91	3015	24.5551	3.40337	89.7113	23.7069	76.2931	0	0	0	2.30557	21.4013	27.2055	17.2755	12.1725	9.21027	5.92313	4.50628	4.50628	71.7868	23.7069
U1307	B	15	6	10-12	135.9	146.41	3018.4	33.4556	3.35223	108.546	37.6795	62.3205	0	0	0	5.51443	32.1651	26.6646	11.3436	8.84657	7.07556	4.7789	3.61125	3.61125	58.7092	37.6795
U1307	B	15	6	64-66	136.4	147.31	3024.5	11.4736	3.80278	61.9498	9.86533	90.1347	0	0	0	2.11767	7.74766	13.8664	18.4522	18.5022	17.3971	12.5728	9.34393	9.34393	80.7907	9.86533
U1307	B	15	6	128-130	137.08	148.38	3033.1	n.a.	n.a.	n.a.	n.a.	n.a.	n.a.	n.a.	n.a.	n.a.	n.a.	n.a.	n.a.	n.a.	n.a.	n.a.	n.a.	n.a.	n.a.	n.a.
U1307	B	15	7	13-15	137.42	148.95	3038.8	12.762	3.78847	67.543	11.3058	88.6942	0	0	0	2.37956	8.92622	15.2605	19.266	18.0605	16.1677	11.51	8.42955	8.42955	80.2647	11.3058
U1307	B	15	7	45.5-47.5	137.75	149.5	3044.3	11.1635	3.78341	57.5826	8.81462	91.1854	0	0	0.0739006	2.20135	6.53937	13.8135	19.0552	18.9823	17.3378	12.278	9.71861	9.71861	81.4668	8.81462
U1307	B	16	1	47-49	138.26	150.04	3049.7	10.5725	3.29479	41.4085	3.28249	96.7175	0	0	0	0.0106113	3.27188	14.1224	23.6893	21.4108	16.6856	11.3016	9.50786	9.50786	87.2096	3.28249
U1307	B	16	1	92.5-94.5	138.72	150.51	3054.4	15.762	3.41369	64.0814	10.6042	89.3958	0	0	0	0.833042	9.77118	22.0597	22.4245	16.6451	13.055	8.69542	6.51611	6.51611	82.8797	10.6042
U1307	B	16	1	130-132	139.1	150.88	3058.1	21.2299	3.51122	87.6505	20.7478	79.2522	0	0	0	2.69458	18.0532	24.0368	18.0544	13.6216	11.5796	7.80581	4.15398	4.15398	75.0982	20.7478
U1307	B	16	2	62-64	139.91	151.69	3064.8	22.1037	3.51221	89.1588	20.7618	79.2382	0	0.374292	0.629185	2.83281	16.9255	24.7953	18.9291	13.8467	10.2911	6.52484	4.85119	4.85119	74.387	20.7618
U1307	B	16	2	113-115	140.43	152.21	3068.8	13.123	3.48896	56.6787	8.09222	91.9078	0	0	0	0.919273	7.17295	18.0888	22.0025	18.8701	14.9503	9.90071	8.09546	8.09546	83.8123	8.09222
U1307	B	16	3	5-7	140.85	152.63	3072.1	14.9562	3.51943	63.5032	10.369	89.631	0	0	0	0.962235	9.40672	21.0653	21.7838	16.7831	13.5354	9.19001	7.2734	7.2734	82.3577	10.369
U1307	B	16	3	80-82	141.6	153.38	3078	20.4935	3.50407	83.9182	19.0696	80.9304	0	0	0	2.20887	16.8607	23.8667	19.1072	14.5743	11.1018	7.25505	5.02531	5.02531	75.9051	19.0696
U1307	B	16	3	130-132	142.1	153.88	3082	40.1919	2.94639	113.453	41.341	58.659	0	0	0	6.75299	34.588	28.2712	11.6353	7.46038	5.31791	3.48792	2.48637	2.48637	56.1727	41.341
U1307	B	16	4	30-32	142.6	154.38	3085.9	37.4409	2.8843	105.533	35.8613	64.1387	0	0	0	4.85673	31.0046	30.9907	13.8021	8.00549	5.34996	3.29071	2.69976	2.69976	61.4389	35.8613
U1307	B	16	4	80-82	143.1	154.88	3089.8	20.5935	3.21546	81.0366	17.2444	82.7556	0	0	0	2.13882	15.1055	22.6601	21.223	17.334	11.7338	6.34763	3.45708	3.45708	79.2986	17.2444
U1307	B	16	4	130-132	143.6	155.38	3093.8	23.4923	3.33527	86.7408	21.3903	78.6097	0	0	0	2.28777	19.1025	26.5711	18.9226	13.2478	9.68918	5.997	4.18201	4.18201	74.4277	21.3903
U1307	B	16	5	30-32	144.1	155.88	3099.4	16.1017	3.47933	65.6149	11.329	88.671	0	0	0	0.357231	10.9717	22.852	21.5814	16.407	12.5105	8.43029	6.88982	6.88982	81.7812	11.329
U1307	B	16	5	80-82	144.6	156.38	3105.1	15.3311	3.30604	56.0949	7.36492	92.6351	0	0	0	0.138873	7.22605	23.4029	25.4827	16.7852	11.7501	7.96409	7.25003	7.25003	85.385	7.36492
U1307	B	16	5	130-132	145.1	156.88	3114.4	14.109	3.32875	53.0519	6.45928	93.5407	0	0	0	0.250179	6.2091	20.8401	25.374	18.3565	12.7836	8.40365	7.78293	7.78293	85.7578	6.45928
U1307	B	16	6	30-32	145.6	157.38	3116.28	16.602	3.62805	69.2781	12.6285	87.3715	0	0	0	1.47272	11.1557	23.2072	21.3149	15.4215	11.9952	8.03343	7.39926	7.39926	79.9723	12.6285
U1307	B	16	6	80-82	146.1	157.88	3118	30.0567	3.23007	97.8496	30.1721	69.8279	0	0	0	3.31539	26.8567	29.1011	14.9907	9.92927	7.46006	4.76208	3.58478	3.58478	66.2432	30.1721
U1307	B	16	6	130-132	146.6	158.38	3119.79	29.9886	3.23434	99.9063	29.2256	70.7744	0	0	0	4.42741	24.7982	29.0408	16.0916	10.162	7.30168	4.55894	3.61939	3.61939	67.155	29.2256
U1307	B	16	7	30-32	147.1	158.88	3121.6	20.9707	3.70696	87.4801	21.9108	78.0892	0	0	0	1.95283	19.958	23.8853	16.6719	13.1867	10.971	7.47957	5.89481	5.89481	72.1944	21.9108
U1307	B	17	1	55-57	148.26	160.04	3125.78	18.3107	3.57793	77.9567	15.772	84.228	0	0.239709	0.284036	2.0874	13.1609	22.8874	20.4785	15.3287	11.72	7.72971	6.08375	6.08375	78.1442	15.772
U1307	B	17	1	130-132	149.01	160.79	3128.46	13.5552	3.55446	58.3203	8.48747	91.5125	0	0	0	0.202456	8.28501	19.5936	21.675	17.8606	14.3962	9.74231	8.24484	8.24484	83.2677	8.48747
U1307	B	17	2	30-32	149.51	161.29	3130.31	14.2397	3.52149	60.5606	9.26955	90.7305	0	0	0	0.207274	9.06227	20.4732	21.6292	17.5413	13.9488	9.40141	7.73654	7.73654	82.9939	9.26955
U1307	B	17	2	80-82	150.01	161.79	3132.17	14.1832	3.60298	62.3476	9.94572	90.0543	0	0	0	0.787546	9.15817	19.9201	21.2124	17.3748	14.0787	9.50161	7.96663	7.96663	82.0877	9.94572
U1307	B	17	2	130-132	150.51	162.29	3134.03	14.2967	3.59454	63.2209	10.2612	89.7388	0	0	0	0.700908	9.56028	19.8014	21.0255	17.4678	14.1494	9.49971	7.795	7.795	81.9438	10.2612
U1307	B	17	3	30-32	151.01	162.79	3135.89	14.1727	3.55651	61.8592	9.77503	90.225	0	0	0	0.756052	9.01898	19.6696	21.4607	17.7133	14.1676	9.46027	7.75344	7.75344	82.4715	9.77503
U1307	B	17	3	130-132	152.01	163.79	3139.39	14.8029	3.61942	67.0709	11.5209	88.4791	0	0.174397	0.72924	1.40469	9.21256	19.4764	21.0271	17.2923	13.9498	9.38543	7.34818	7.34818	81.1309	11.5209
U1307	B	17	4	50-52	152.71	164.49	3142.08	14.8054	3.5836	65.4637	11.0694	88.9306	0	0	0	0.938356	10.131	19.9037	21.1313	17.4378	13.841	9.16939	7.44741	7.44741	81.4832	11.0694
U1307	B	17	4	130-132	153.51	165.29	3144.97	15.3642	3.57503	66.5185	11.5362	88.4638	0	0	0	0.89836	10.6378	20.8522	21.1784	16.9811	13.3256	8.83132	7.2952	7.2952	81.1686	11.5362
U1307	A	19	1	130-132	154.4	167.13	3154.01	15.061	3.31613	57.3885	8.03129	91.9687	0	0	0	0.394304	7.63699	21.9839	24.1174	17.7749	12.9242	8.19452	6.97371	6.97371	84.995	8.03129
U1307	A	19	2	80-82	155.4	168.13	3161.3	23.5764	3.14475	78.0813	17.8274	82.1726	0	0	0	0.988058	16.8393	29.8946	21.893	12.4596	8.09728	5.20542	4.62275	4.62275	77.5499	17.8274
U1307	A	19	2	130-132	155.9	168.63	3164.9	33.826	2.90406	97.7101	31.0209	68.9791	0	0	0	3.26218	27.7587	32.0211	15.6925	8.80282	6.02615	3.70426	2.73226	2.73226	66.2469	31.0209
U1307	A	19	3	30-32	156.4	169.13	3169.3	30.6018	3.04227	94.7587	28.3245	71.6755	0	0	0	2.71966	25.6049	30.5003	16.7806	10.0838	6.90458	4.26875	3.13738	3.13738	68.5381	28.3245
U1307	A	19	3	80-82	156.9	169.63	3175.2	22.4805	3.24188	83.8033	19.5104	80.4896	0	0	0	1.84038	17.67	24.9066	20.6582	15.1178	10.0635	5.91482	3.82871	3.82871	76.6609	19.5104
U1307	A	19	3	130-132	157.4	170.13	3180.7	17.234	3.36017	66.472	11.8144	88.1856	0	0	0	0.254899	11.5595	24.4019	21.7805	16.0105	12.2015	7.75659	6.03458	6.03458	82.1511	11.8144
U1307	A	19	4	30-32	157.9	170.63	3186.9	12.5224	3.58343	51.1901	5.96392	94.0361	0	0	0	0.297692	5.66623	18.9876	23.7208	18.3249	13.8136	9.64223	9.54694	9.54694	84.4891	5.96392
U1307	A	19	4	80-82	158.4	171.13	3189.9	15.3957	3.25603	55.8328	7.11439	92.8856	0	0	0	0.00353534	7.11085	23.4846	25.1497	17.4288	12.0174	7.81802	6.98716	6.98716	85.8984	7.11439
U1307	A	19	4	130-132	158.9	171.63	3192.5	14.0184	3.35475	51.8673	6.10664	93.8934	0	0	0	0.30887	5.79777	20.6165	26.2528	18.5788	12.1946	8.08078	8.16984	8.16984	85.7235	6.10664
U1307	A	19	5	30-32	159.4	172.13	3195.1	16.4741	3.2979	59.5408	8.8346	91.1654	0	0	0	0.340119	8.49448	24.266	25.5455	16.4035	10.8714	7.18111	6.89786	6.89786	84.2675	8.8346
U1307	A	19	5	80-82	159.9	172.63	3197.6	31.0505	3.16713	99.4632	30.6018	69.3982	0	0	0	3.65998	26.9419	28.9056	15.8528	9.81161	6.92571	4.45757	3.44492	3.44492	65.9532	30.6018
U1307	A	19	5	130-132	160.4	173.13	3200.1	30.0181	3.19467	96.325	28.718	71.282	0	0	0	3.21063	25.5073	30.0023	16.3451	9.67882	6.79939	4.50481	3.95172	3.95172	67.3303	28.718
U1307	A	19	6	30-32	160.9	173.63	3202.7	33.4572	2.99812	99.408	31.3528	68.6472	0	0	0	3.7993	27.5535	31.6414	15.3066	8.64639	6.08108	3.81324	3.15842	3.15842	65.4887	31.3528
U1307	A	19	6	80-82	161.4	174.13	3205.2	26.0215	3.43467	95.7534	26.7593	73.2407	0	0	0	3.20752	23.5518	25.9558	16.5144	11.8515	8.94604	5.77621	4.19661	4.19661	69.0441	26.7593
U1307	A	19	6	130-132	161.9	174.63	3208.54	19.7783	3.55864	83.3326	19.0116	80.9884	0	0	0	1.73101	17.2806	22.6714	18.4918	15.3373	11.6935	7.36568	5.42869	5.42869	75.5597	19.0116
U1307	A	19	7	20-22	162.3	175.03	3209.8	21.6468	3.37164	83.9424	19.4124	80.5876	0	0	0	2.09789	17.3145	24.7931	19.6181	14.6874	10.5832	6.47284	4.4329	4.4329	76.1547	19.4124
U1307	A	19	7	70-72	162.8	175.53	3212.3	15.1857	3.29922	55.8619	7.29037	92.7096	0	0	0	0.156543	7.13383	22.8393	25.1975	17.5887	11.982	7.81671	7.28537	7.28537	85.4243	7.29037
1Blake-Mizen et al. (2019)
