# Supplementary material for: Cold spells over Greenland during the mid-Pliocene Warm Period
Source: Research Square preprint supplement (doi:10.21203/rs.3.rs-4315645/v1), 2024-05-29
Supplement: Supplementary file 3 [file f99f084d72f522b16b5464cc.xlsx]

## Sheet: Sheet1
Site	Hole	Core	Section	Interval (cm)	Depth (mbsf)	Depth (rmcd)1	Age (ka)1	208Pb/204Pb	207Pb/204Pb	206Pb/204Pb	207Pb/206Pb	208Pb/206Pb	206Pb/207Pb	143Nd/144Nd2	ɛNd(0)3
U1307	B	15	4	130-132	134.1	143.41	2995.9	38.1967	15.4063	17.9714	0.857288	2.12547	1.16647	0.511985	-12.744
U1307	B	15	5	30-32	134.6	144.24	3003.7	37.9048	15.37	17.799	0.863567	2.12969	1.15799	0.511775	-16.8338
U1307	B	15	5	80-82	135.1	145.07	3009.3	37.4475	15.191	16.9686	0.895268	2.20695	1.11698	0.511662	-19.0297
U1307	B	15	5	130-132	135.6	145.91	3015	38.3573	15.4892	18.3197	0.845514	2.09382	1.18271	0.51204	-11.6641
U1307	B	15	6	10-12	135.9	146.41	3018.4	38.4247	15.5375	18.6037	0.835216	2.06551	1.1973	0.51199	-12.6484
U1307	B	15	6	64-66	136.4	147.31	3024.5	38.3687	15.489	18.3013	0.846364	2.09655	1.18152	0.512061	-11.2496
U1307	B	15	6	128-130	137.08	148.38	3033.1	38.4711	15.4897	18.2803	0.847365	2.10459	1.18013	0.512049	-11.4818
U1307	B	15	7	13-15	137.42	148.95	3038.8	38.3805	15.455	18.1214	0.852858	2.118	1.17253	0.512041	-11.6417
U1307	B	15	7	45.5-47.5	137.75	149.5	3044.3	38.4745	15.4933	18.3029	0.84651	2.10212	1.18132	0.512083	-10.8311
U1307	B	16	1	47-49	138.26	150.04	3049.7	37.5036	15.1958	16.9907	0.894388	2.20736	1.11808	0.511591	-20.4226
U1307	B	16	1	92.5-94.5	138.72	150.51	3054.4	38.0888	15.3822	17.7169	0.868256	2.14992	1.15173	n.a.	n.a.
U1307	B	16	1	130-132	139.1	150.88	3058.1	38.5484	15.5617	18.5385	0.839438	2.07941	1.19127	0.512032	-11.829
U1307	B	16	2	62-64	139.91	151.69	3064.8	38.2441	15.4967	18.3213	0.845854	2.08748	1.18224	0.511962	-13.1868
U1307	B	16	2	113-115	140.43	152.21	3068.8	38.1505	15.4366	17.974	0.858849	2.12259	1.16435	0.511862	-15.1377
U1307	B	16	3	45419	140.85	152.63	3072.1	38.0794	15.3806	17.8532	0.861524	2.13298	1.16073	0.511978	-12.8834
U1307	B	16	3	80-82	141.6	153.38	3078	38.418	15.544	18.5541	0.837786	2.07067	1.19362	0.511983	-12.7674
U1307	B	16	3	130-132	142.1	153.88	3082	38.3835	15.5515	18.6907	0.832062	2.05368	1.20183	0.511932	-13.771
U1307	B	16	4	30-32	142.6	154.38	3085.9	38.3671	15.5425	18.6576	0.833058	2.05643	1.2004	0.511847	-15.4292
U1307	B	16	4	80-82	143.1	154.88	3089.8	38.5007	15.5893	18.8815	0.825662	2.03911	1.21115	0.511816	-16.0331
U1307	B	16	4	130-132	143.6	155.38	3093.8	38.343	15.5062	18.4599	0.840004	2.07712	1.19047	0.511877	-14.8459
U1307	B	16	5	30-32	144.1	155.88	3099.4	37.7873	15.3903	17.8841	0.860589	2.11295	1.16199	0.511856	-15.2567
U1307	B	16	5	80-82	144.6	156.38	3105.1	36.9955	15.1813	16.8016	0.9036	2.20198	1.10668	0.511572	-20.7932
U1307	B	16	5	130-132	145.1	156.88	3114.4	37.1398	15.1332	16.6529	0.908757	2.23026	1.1004	0.511562	-20.9981
U1307	B	16	6	30-32	145.6	157.38	3116.28	37.8234	15.2483	17.1339	0.889959	2.20758	1.12365	0.511619	-19.8692
U1307	B	16	6	80-82	146.1	157.88	3118	38.1923	15.4928	18.2861	0.847262	2.08863	1.18027	0.511975	-12.9282
U1307	B	16	6	130-132	146.6	158.38	3119.79	38.4346	15.5398	18.6134	0.834884	2.06493	1.19777	0.511937	-13.6773
U1307	B	16	7	30-32	147.1	158.88	3121.6	38.3298	15.5196	18.5103	0.838443	2.07071	1.19269	0.511942	-13.57
U1307	B	17	1	55-57	148.26	160.04	3125.78	38.0001	15.4065	17.9105	0.860219	2.12177	1.1625	0.51182	-15.952
U1307	B	17	1	130-132	149.01	160.79	3128.46	37.8121	15.3764	17.7585	0.865876	2.12925	1.1549	0.511827	-15.8291
U1307	B	17	2	30-32	149.51	161.29	3130.31	38.1505	15.4084	17.9578	0.858054	2.1245	1.16543	0.511911	-14.1826
U1307	B	17	2	80-82	150.01	161.79	3132.17	38.0112	15.3967	17.8781	0.861224	2.1262	1.16114	0.511843	-15.5033
U1307	B	17	2	130-132	150.51	162.29	3134.03	37.8929	15.3937	17.8335	0.86321	2.12484	1.15847	0.511893	-14.5396
U1307	B	17	3	30-32	151.01	162.79	3135.89	38.0444	15.4056	17.9035	0.860495	2.12497	1.16212	0.511893	-14.5259
U1307	B	17	3	130-132	152.01	163.79	3139.39	38.0179	15.4226	17.9529	0.859073	2.11769	1.16405	0.511935	-13.7066
U1307	B	17	4	50-52	152.71	164.49	3142.08	n.a.	n.a.	n.a.	n.a.	n.a.	n.a.	0.511885	-14.6871
U1307	B	17	4	130-132	153.51	165.29	3144.97	37.9473	15.4106	17.9462	0.858731	2.11458	1.16451	0.511868	-15.0265
U1307	A	19	1	130-132	154.4	167.13	3154.01	37.3759	15.2659	17.3404	0.8804	2.15551	1.13585	0.511779	-16.7511
U1307	A	19	2	80-82	155.4	168.13	3161.3	37.5243	15.2943	17.2736	0.885434	2.17239	1.12939	0.511856	-15.2625
U1307	A	19	2	130-132	155.9	168.63	3164.9	38.1122	15.5049	18.3228	0.846238	2.0801	1.1817	0.511832	-15.7288
U1307	A	19	3	30-32	156.4	169.13	3169.3	38.4432	15.5552	18.7038	0.831685	2.05543	1.20238	0.511892	-14.5552
U1307	A	19	3	80-82	156.9	169.63	3175.2	38.2545	15.5437	18.6616	0.832956	2.05	1.20054	0.511929	-13.8326
U1307	A	19	3	130-132	157.4	170.13	3180.7	37.9536	15.4168	17.9553	0.858654	2.11386	1.16461	0.511915	-14.1085
U1307	A	19	4	30-32	157.9	170.63	3186.9	37.4805	15.2729	17.1232	0.891969	2.18893	1.12112	0.511804	-16.2739
U1307	A	19	4	80-82	158.4	171.13	3189.9	37.2113	15.2181	16.9529	0.897684	2.19504	1.11398	0.511774	-16.8552
U1307	A	19	4	130-132	158.9	171.63	3192.5	36.7061	15.0272	16.1284	0.931749	2.27592	1.07325	0.511459	-22.9977
U1307	A	19	5	30-32	159.4	172.13	3195.1	37.0964	15.1733	16.622	0.912868	2.23181	1.09545	0.511624	-19.7775
U1307	A	19	5	80-82	159.9	172.63	3197.6	38.373	15.5164	18.4185	0.842458	2.0834	1.187	0.511996	-12.5225
U1307	A	19	5	130-132	160.4	173.13	3200.1	38.0678	15.4456	18.1381	0.851577	2.09882	1.17429	0.511924	-13.9184
U1307	A	19	6	30-32	160.9	173.63	3202.7	38.0534	15.4757	18.1995	0.85037	2.09097	1.17596	0.511887	-14.6566
U1307	A	19	6	80-82	161.4	174.13	3205.2	38.2986	15.5056	18.47	0.839533	2.07359	1.19114	0.511955	-13.3262
U1307	A	19	6	130-132	161.9	174.63	3208.54	38.3597	15.5193	18.5617	0.836109	2.06664	1.19602	0.512005	-12.3566
U1307	A	19	7	20-22	162.3	175.03	3209.8	38.1296	15.4674	18.3176	0.844425	2.08166	1.18424	0.51188	-14.7768
U1307	A	19	7	70-72	162.8	175.53	3212.3	36.5499	14.9939	16.1404	0.928996	2.26456	1.07643	0.511491	-22.3656
1Blake-Mizen et al. (2019)
2Normalized to 0.512115 (Tanaka et al., 2000)
3CHUR=0.512638 (Jacobsen and Wasserburg, 1980)
