# Supplementary material for: Cold spells over Greenland during the mid-Pliocene Warm Period
Source: Research Square preprint supplement (doi:10.21203/rs.3.rs-4315645/v1), 2024-05-29
Supplement: Supplementary file 4 [file faabd55cf81e5660807634d9.xlsx]

## Sheet: Sheet1
Site	Hole	Core	Section	Interval (cm)	Depth (mbsf)	Depth (rmcd)1	Age (ka)1	%<63	%10-63	SS%	SSmean(µm)
U1307	B	15	4	130-132	134.1	143.41	2995.9	n.a.	n.a.	n.a.	n.a.
U1307	B	15	5	30-32	134.6	144.24	3003.7	94	54	57	24
U1307	B	15	5	80-82	135.1	145.07	3009.3	88	55	62	26
U1307	B	15	5	130-132	135.6	145.91	3015	77	53	69	29
U1307	B	15	6	10-12	135.9	146.41	3018.4	63	44	71	32
U1307	B	15	6	64-66	136.4	147.31	3024.5	90	45	50	23
U1307	B	15	6	128-130	137.08	148.38	3033.1	n.a.	n.a.	n.a.	n.a.
U1307	B	15	7	13-15	137.42	148.95	3038.8	89	47	53	24
U1307	B	15	7	45.5-47.5	137.75	149.5	3044.3	91	46	50	23
U1307	B	16	1	47-49	138.26	150.04	3049.7	97	53	54	22
U1307	B	16	1	92.5-94.5	138.72	150.51	3054.4	90	56	63	26
U1307	B	16	1	130-132	139.1	150.88	3058.1	79	52	65	28
U1307	B	16	2	62-64	139.91	151.69	3064.8	79	53	67	28
U1307	B	16	2	113-115	140.43	152.21	3068.8	92	53	58	24
U1307	B	16	3	5-7	140.85	152.63	3072.1	90	54	61	26
U1307	B	16	3	80-82	141.6	153.38	3078	81	53	66	27
U1307	B	16	3	130-132	142.1	153.88	3082	59	45	77	33
U1307	B	16	4	30-32	142.6	154.38	3085.9	64	51	79	33
U1307	B	16	4	80-82	143.1	154.88	3089.8	83	56	68	26
U1307	B	16	4	130-132	143.6	155.38	3093.8	79	55	70	29
U1307	B	16	5	30-32	144.1	155.88	3099.4	89	56	63	26
U1307	B	16	5	80-82	144.6	156.38	3105.1	93	61	66	26
U1307	B	16	5	130-132	145.1	156.88	3114.4	94	59	63	25
U1307	B	16	6	30-32	145.6	157.38	3116.28	88	55	63	27
U1307	B	16	6	80-82	146.1	157.88	3118	70	51	73	31
U1307	B	16	6	130-132	146.6	158.38	3119.79	71	52	74	31
U1307	B	16	7	30-32	147.1	158.88	3121.6	78	50	64	28
U1307	B	17	1	55-57	148.26	160.04	3125.78	84	54	64	27
U1307	B	17	1	130-132	149.01	160.79	3128.46	92	54	58	25
U1307	B	17	2	30-32	149.51	161.29	3130.31	91	54	60	25
U1307	B	17	2	80-82	150.01	161.79	3132.17	90	53	59	25
U1307	B	17	2	130-132	150.51	162.29	3134.03	90	53	59	25
U1307	B	17	3	30-32	151.01	162.79	3135.89	90	53	59	25
U1307	B	17	3	130-132	152.01	163.79	3139.39	89	52	59	25
U1307	B	17	4	50-52	152.71	164.49	3142.08	89.0768	53.1224	59.6367	26.772
U1307	B	17	4	130-132	153.51	165.29	3144.97	88.6192	53.8365	60.7503	27.183
U1307	A	19	1	130-132	154.4	167.13	3154.01	92.0796	58.595	63.6351	26.946
U1307	A	19	2	80-82	155.4	168.13	3161.3	82	61	74	29
U1307	A	19	2	130-132	155.9	168.63	3164.9	69	54	78	32
U1307	A	19	3	30-32	156.4	169.13	3169.3	72	55	76	31
U1307	A	19	3	80-82	156.9	169.63	3175.2	81	56	70	27
U1307	A	19	3	130-132	157.4	170.13	3180.7	88	57	65	27
U1307	A	19	4	30-32	157.9	170.63	3186.9	94	56	59	24
U1307	A	19	4	80-82	158.4	171.13	3189.9	93	61	66	26
U1307	A	19	4	130-132	158.9	171.63	3192.5	94	60	64	25
U1307	A	19	5	30-32	159.4	172.13	3195.1	91	62	68	26
U1307	A	19	5	80-82	159.9	172.63	3197.6	70	52	74	31
U1307	A	19	5	130-132	160.4	173.13	3200.1	72	53	75	31
U1307	A	19	6	30-32	160.9	173.63	3202.7	69	53	77	32
U1307	A	19	6	80-82	161.4	174.13	3205.2	73	51	69	29
U1307	A	19	6	130-132	161.9	174.63	3208.54	81	52	64	27
U1307	A	19	7	20-22	162.3	175.03	3209.8	81	55	68	28
U1307	A	19	7	70-72	162.8	175.53	3212.3	93	61	65	25
1Blake-Mizen et al. (2019)
